# Supplementary material
Source: publisher site journal article supplement (https://www.dovepress.com/get_supplementary_file.php?f=451436.docx)
Supplement: Supplementary file 1 [file get_supplementary_file.php]

**Supplementary** **Table 1** Keywords Search Used in the Screening Process.

| Database | Search string |
| --- | --- |
| PubMed | ("coronary artery disease"[mesh] OR "coronary artery disease"[tiab] OR "myocardial infarction"[mesh] OR "myocardial infarction"[tiab] OR "acute coronary syndrome"[mesh] OR "acute coronary syndrome"[tiab] OR "coronary artery bypass"[mesh] OR "coronary artery bypass"[tiab] OR "coronary artery disease"[tiab]) AND ("patient readmission"[mesh] OR "rehospitali*"[tiab] OR "readmission*"[tiab] OR "re-admission*"[tiab] OR "readmit*"[tiab] OR "repeat* hospital*"[tiab]) AND ("Predictive Value of Tests"[mesh] OR "ROC Curve"[mesh] OR "Sensitivity and Specificity"[mesh] OR "Nomograms"[mesh] OR "predictive factor*"[tiab] OR "predict*"[tiab] OR "model*"[tiab] OR "c-statistic*"[tiab] OR "ROC*"[tiab] OR "nomogram"[tiab]) |
| Web of Science | TS=((“coronary artery disease” OR “myocardial infarction” OR “acute coronary syndrome” OR “coronary artery bypass” OR “coronary artery disease”) AND (“patient readmission” OR “rehospitali*” OR “readmission*” OR “re-admission*” OR “readmit*” OR “repeat* hospital*”) AND (“Predictive Value of Tests” OR “ROC Curve” OR “Sensitivity and Specificity” OR “nomogram” OR “predictive factor*” OR “predict*” OR “model*” OR “c-statistic*” OR “ROC*”)) |
| EBSCOhost | (SU coronary artery disease OR SU myocardial infarction OR SU acute coronary syndrome OR SU coronary artery bypass OR SU coronary artery disease) AND (SU patient readmission OR SU patient readmission OR SU readmission OR SU rehospitalization OR SU re-admission OR SU re-hospitalization OR SU repeated hospitalization) AND (SU Predictive Value of Tests OR SU ROC Curve OR SU (Sensitivity and Specificity) OR SU nomogram OR predictive factor OR prediction OR model OR c-statistic) |
| Embase | (SU coronary artery disease OR SU myocardial infarction OR SU acute coronary syndrome OR SU coronary artery bypass OR SU coronary artery disease) AND (SU patient readmission OR SU readmission OR SU rehospitalization OR SU re-admission OR SU re-hospitalization OR SU repeated hospitalization) AND (SU Predictive Value of Tests OR SU ROC Curve OR SU (Sensitivity and Specificity) OR SU nomogram OR predictive factor OR prediction OR model OR c-statistic) |

**Supplementary** **Table 2** Basic Characteristics of the Included Studies

| Included studies | Participants | | Modeling methods | Study design | Outcome | | | Sample size | | Methods to handle missing data value | Validation method | | C index | |
| --- | --- | --- | --- | --- | --- | --- | --- | --- | --- | --- | --- | --- | --- | --- |
| Category | Country | Type of readmission | Length of time | Readmission rate | Development | Validation | Internal validation | External validation | Model development | Model validation |
| Song 202330 | ≥60, CAD patients | China | XGB, RF, MLP, CB, LR | Retrospective study | Unplanned readmission | 7 days | None | 668 | 166 | Delete the variable with missing data >90%, and use the random forest to replace  the missing data | bootstrap | None | XGB: 0.885;  RF: 0.885;  MLP: 0.868;  CB: 0.915;  LR: 0.868. | XGB: 0.973;  RF: 0.970;  MLP: 0.771;  CB: 0.972;  LR: 0.889. |
| Engoren 201313 | Patients after CABG | US | BLR, GP, ANN | Retrospective study | No clear reporting | 1 month | Construction group: 7.600%;  Validation group: 8.000% | 5355 | 2711 | coding process | cross-validation | None | BLR: 0.644; GP: 0.654; ANN: 0.537 | BLR: 0.644; GP: 0.654; ANN: 0.537 |
| Nguyen 201829 | ≥18, AMI patients | US | Logistic regression | Retrospective study | Unplanned readmission | 1 month | 13.000% | 826 | Not reported | Delete | cross-validation | None | First-Day: 0.750; Full-Stay: 0.780④ | First-Day: 0.700; Full-Stay: 0.730 |
| Benuzillo, 201831 | Patients after CABG | US | Logistic regression | Retrospective study | All-cause readmission | 1 month | Construction group: 9.100%  validation group：  8.200% | 2589 | 896 | Delete | bootstrap | None | 0.650 | 0.630 |
| Li 201932 | AMI patients | China | Cox proportional hazards model | Prospective study | Unplanned readmission | 1 month | 6.300% | 3387 | None | No handling  missing data | None | None | 0.690 | None |
| Zhang 202022 | >18, AMI patients | China | stacking-based model | Retrospective study | All-cause readmission | 1 month | 12.900% | 3283 | 657 | Delete | cross-validation | None | 0.720 | Not reported |
| Matheny 202127 | AMI patients | US | EN, LASSO, RR, RF, GB⑤ | Retrospective study | Unplanned readmission | 1 month | Construction group: 15.100%;  validation group： 10.200% | 6163 | 4024 | Multiple Imputation | Not reported | Geographical validation | EN: 0.732; LASSO: 0.731; RR: 0.735; RF: 0.695; GB: 0.731; | EN: 0.695/0.655; LASSO: 0.695/0.595; RR: 0.686/0.558; RF: 0.686/0.608; GB: 0.704/0.606 |
| Liu 202121 | Patients after CABG | China | Logistic regression | Retrospective study | No clear reporting | 1 month | 4.800% | 825 | 1158 | Delete | None | Temporal Validation | 0.876 | 0.865 |
| Gupta202028 | ≥20; AMI patients | Canada | LR, NB, SVMs, RF, GB, DNN⑥ | Retrospective study | All-cause readmission | 1 month/1 year | Model (1 month): 16.300%; Model (1 year): 45.100% | 7018 | Not reported | Delete | cross-validation | None | 1 month: LR: 0.631; NB: 0.627; SVMs: 0.627; RF: 0.639; GB: 0.641; DNN: 0.637;  1 year: LR: 0.719; NB: 0.692; SVMs: 0.718; RF: 0.716; GB: 0.716; DNN: 0.720. | NR |
| Kini 201823 | AMI patients | US | Cox proportional hazards model | Retrospective study | All-cause readmission | 3 months | 27.500% | 86849 | 26107 | No handling  missing data | bootstrap | None | NR | 0.662 |
| Dodson 202119 | ≥75; AMI patients | US | Bayesian model | Prospective study | All-cause readmission | 6 months | 40.700% | 3006 | 1002 | Delete | bootstrap | None | 0.680 | 0.650 |
| Yang, 202124 | ≥60, CAD patients | China | Logistic regression | Retrospective study | No clear reporting | 6 months | 11.530% | 1179 | 357 | Delete | Not reported | Temporal validation | NR | 0.890/0.875 |
| Li 202220 | ≥18; ACS patients | China | Logistic regression | Retrospective study | No clear reporting | 6 months | 16.670% | 498 | 149 | Delete | bootstrap | None | 0.788 | 0.776 |
| Dreyer 202126 | 18-55, AMI patients | US | Bayesian model | Prospective study | All-cause readmission | 1 year | 30.400% | 2979 | 993 | Multiple Imputation | bootstrap | None | 0.670 | 0.670 |
| Xu, 202325 | 18~59, CAD patients | China | Logistic regression | Retrospective study | No clear reporting | 5 years | Not reported | 302 | Not reported | No handling  missing data | None | None | 0. 888 | None |
| **Abbreviations:** XGB: extreme gradient boosting; RF: random forest; MLP: multilayer perceptron; CB: categorical boosting; LR: logistic regression; BLR: Logistic regression; GP: Genetic programs; ANN: Artificial neural nets; EN: Elastic net; LASSO: Least absolute shrinkage and selection operator; RR: Ridge regression; GB: Gradient boosting; NB: naive Bayes; SVMs: support vector machine; DNN: deep neural networks. | | | | | | | | | | | | | | |

**Supplementary** **Table 3** Predictors Included in the Model

| Type of disease | Predictors | | | | | | | | |
| --- | --- | --- | --- | --- | --- | --- | --- | --- | --- |
| Type of readmission | | | Length of time | | | | | |
| UR | AR | NR | 7 days | 1 month | 3 months | 6 months | 1 year | 5 years |
| CAD | √ |  |  | **Song, 2023**30: Age, Gender, Length of stay (days), Hypertension, Diabetes, Fracture, Osteoporosis, Cerebral infarction, Heart failure, Arrhythmia, Aspirin, Atorvastatin, Danhong injection, Isosorbide mononitrate, Iodixanol, Calcii dibutyry-ladenosini cyclophosphas for injection, Furosemide, Rabeprazole, Clopidogrel, Metoprolol, Trimetazidine, Rosuvastatin, γ-glutamyl transpeptidase, Albumin, Albumin and globulin ratio, Alanine aminotransferase (ALT), Cholinesterase, Low density lipoprotein cholesterol, Serum carbon dioxide, Triglyceride, High density lipoprotein cholesterol, High-sensitivity troponin, Estimated glomerular filtration rate, Aspartate aminotransferase (AST)/ALT, Cystatin C, Creatinine, CK, Serum potassium, Procalcitonin test, Serum phosphatase, Serum magnesium, Urea, Uric acid, Serum glucose, Lactic dehydrogenase, Neuron-specific enolase, AST, Ferritin, Homocysteine, Cytokeratin 19 fragment 21-1, Anion gap, Apolipoprotein A-1 (ApoA-1), ApoA-1/ApoB, ApoB, Lipoprotein, Total cholesterol, Total bilirubin (plasma), Total protein (plasma), High-sensitivity C-reactive protein, Red blood cell distribution width, Red blood cell (plasma), Hematocrit, Percentage of lymphocytes, Lymphocyte count, Glycosylated hemoglobin, Hemoglobin, The percentage of neutrophils, Neutrophil count, B-type natriuretic peptide, D-dimer, Activated partial thromboplastin time, Hepatitis B envelop antibody, Hepatitis B surface antibody, Hepatitis B core antibody, International normalized ratio of prothrombin time, Prothrombin time, Prothrombin time activity, Fibrinogen degradation product, Fibrinogen, White blood cell (urine), Red blood cell (urine), Epithelial cell (urine) |  |  |  |  |  |
|  |  | √ |  |  |  | **Yang 2021**24: Gender, arrhythmia, history of PCI procedure, self-care score, triglycerides, D-dimer |  | **Xu 2023**25: PCI history, number of vessels with coronary lesions, fasting blood glucose |
| AMI | √ |  |  |  | **Li, 2019**32**:** Age, insurance, clinical characteristics (STEMI, last LVEF before discharge, mini-GRACE, in-hospital complication scores), revascularization, length of stay;  **Matheny, 2021**27**:** Discharge location, age, hospital score, hemoglobin level, and troponin level;  **Nguyen 2018**29**:**  *First-Day:* renal function, age, elevated BNP, diabetes mellitus history, sex, history of intervention with percutaneous coronary intervention, blood pressure.  *Full-stay:* renal function, age, elevated BNP, diabetes mellitus history, sex, history of intervention with percutaneous coronary intervention, blood pressure, use of intravenous diuretic medications at least once during hospitalization, anemia on discharge, discharge to a post–acute care facility. |  |  |  |  |
|  | √ |  |  |  | **Kini 2018**23**:** Age, HF at first medical contact, heart rate at first medical contact, current dialysis, diabetes mellitus, history of HF, cerebrovascular disease, peripheral artery disease, chronic lung disease, complications at the index hospitalization, HF. | **Dodson 2021**19**:** History of chronic obstructive pulmonary disease (COPD), history of heart failure, initial heart rate, first diastolic BP, ischaemic ECG changes, initial hemoglobin, ejection fraction, length of stay, self-reported health status and functional mobility | **Dreyer 2021**26**:** higher level of depression at admission, worse baseline physical health, in-hospital complications of heart failure, chronic obstructive pulmonary disease, diabetes mellitus, female sex, low income, prior AMI, greater in-hospital length of stay, and not being employed. |  |
| CABG |  |  | √ |  | **Engoren, 2013**13**:** Female sex, prior cardiac surgery, prior diuretics use, any complication, deep sternal infections, postoperative length of stay (per day);  **Liu, 2021**21**:** Age≥65, female gender, private insurance, diabetes, hypertension levels 2 and 3, and congenital heart disease. |  |  |  |  |
|  | √ |  |  | **Benuzillo 2018**31**:** Age, prior heart failure, albumin, previous myocardial infarction, history of diabetes |  |  |  |  |
| ACS |  |  | √ |  |  |  | **Li 2022**20**:** ACS type, treatment, hypertension, SUA, length of stay, statins, and adverse events that occurred during hospitalization |  |  |
| Abbreviations: UR: Unplanned readmission; AR: All-cause readmission; NR: Not clear reporting; | | | | | | | | | |

**Supplementary** **Table 4** Risk of Bias Appraisal Results of Eligible Articles Adapted from PROBAST18

| Study | ROB | | | | Applicability | | | Overall | |
| --- | --- | --- | --- | --- | --- | --- | --- | --- | --- |
| Participants | Predictors | Outcome | Analysis | Participants | Predictors | Outcome | ROB | Applicability |
| Song 202330 | - | + | + | - | + | + | + | - | + |
| Engoren 201313 | + | + | ? | - | + | + | - | - | - |
| Liu 202121 | + | + | ? | - | + | + | - | - | - |
| Li 201932 | + | + | + | - | + | + | + | - | + |
| Matheny 202127 | + | + | + | - | + | + | + | - | + |
| Nguyen 201829 | + | ? | + | - | + | - | + | - | - |
| Benuzillo 201831 | + | + | + | - | + | + | + | - | + |
| Gupta 202028 | + | + | + | - | + | + | + | - | + |
| Kini 201823 | + | + | + | - | + | + | + | - | + |
| Dodson 202119 | + | + | + | - | + | + | + | - | + |
| Li 202220 | + | + | ? | - | + | + | - | - | - |
| Yang, 202124 | - | - | ? | - | + | + | - | - | - |
| Dreyer 202126 | + | + | + | - | + | + | + | - | + |
| Zhang 202022 | + | + | + | - | + | + | + | - | + |
| Xu 202325 | - | + | ? | - | - | + | - | - | - |
| **Abbreviations:** -: High risk of bias; +: Low risk of bias; ?: unclear. | | | | | | | | | |

**Supplementary** **Table 5** PRISMA 2020 Checklist

| **Section and Topic** | **Item #** | **Checklist item** | **Location where item is reported** |
| --- | --- | --- | --- |
| **TITLE** | | |  |
| Title | 1 | Identify the report as a systematic review. | 1 |
| **ABSTRACT** | | |  |
| Abstract | 2 | See the PRISMA 2020 for Abstracts checklist. | 1-2 |
| **INTRODUCTION** | | |  |
| Rationale | 3 | Describe the rationale for the review in the context of existing knowledge. | 2-3 |
| Objectives | 4 | Provide an explicit statement of the objective(s) or question(s) the review addresses. | 2-3 |
| **METHODS** | | |  |
| Eligibility criteria | 5 | Specify the inclusion and exclusion criteria for the review and how studies were grouped for the syntheses. | 4-5 |
| Information sources | 6 | Specify all databases, registers, websites, organisations, reference lists and other sources searched or consulted to identify studies. Specify the date when each source was last searched or consulted. | 4 |
| Search strategy | 7 | Present the full search strategies for all databases, registers and websites, including any filters and limits used. | 3-5, Table 1 |
| Selection process | 8 | Specify the methods used to decide whether a study met the inclusion criteria of the review, including how many reviewers screened each record and each report retrieved, whether they worked independently, and if applicable, details of automation tools used in the process. | 4-7 |
| Data collection process | 9 | Specify the methods used to collect data from reports, including how many reviewers collected data from each report, whether they worked independently, any processes for obtaining or confirming data from study investigators, and if applicable, details of automation tools used in the process. | 6-7 |
| Data items | 10a | List and define all outcomes for which data were sought. Specify whether all results that were compatible with each outcome domain in each study were sought (e.g. for all measures, time points, analyses), and if not, the methods used to decide which results to collect. | 5 |
| 10b | List and define all other variables for which data were sought (e.g. participant and intervention characteristics, funding sources). Describe any assumptions made about any missing or unclear information. | 5-7 |
| Study risk of bias assessment | 11 | Specify the methods used to assess risk of bias in the included studies, including details of the tool(s) used, how many reviewers assessed each study and whether they worked independently, and if applicable, details of automation tools used in the process. | 6-7 |
| Effect measures | 12 | Specify for each outcome the effect measure(s) (e.g. risk ratio, mean difference) used in the synthesis or presentation of results. | 8, table 2 |
| Synthesis methods | 13a | Describe the processes used to decide which studies were eligible for each synthesis (e.g. tabulating the study intervention characteristics and comparing against the planned groups for each synthesis (item #5)). | 5, 7 |
| 13b | Describe any methods required to prepare the data for presentation or synthesis, such as handling of missing summary statistics, or data conversions. | NA |
| 13c | Describe any methods used to tabulate or visually display results of individual studies and syntheses. | 7 |
| 13d | Describe any methods used to synthesize results and provide a rationale for the choice(s). If meta-analysis was performed, describe the model(s), method(s) to identify the presence and extent of statistical heterogeneity, and software package(s) used. | NA |
| 13e | Describe any methods used to explore possible causes of heterogeneity among study results (e.g. subgroup analysis, meta-regression). | NA |
| 13f | Describe any sensitivity analyses conducted to assess robustness of the synthesized results. | NA |
| Reporting bias assessment | 14 | Describe any methods used to assess risk of bias due to missing results in a synthesis (arising from reporting biases). | NA |
| Certainty assessment | 15 | Describe any methods used to assess certainty (or confidence) in the body of evidence for an outcome. | NA |
| **RESULTS** | | |  |
| Study selection | 16a | Describe the results of the search and selection process, from the number of records identified in the search to the number of studies included in the review, ideally using a flow diagram. | 7-8,  Figure 1 |
| 16b | Cite studies that might appear to meet the inclusion criteria, but which were excluded, and explain why they were excluded. | Figure 1 |
| Study characteristics | 17 | Cite each included study and present its characteristics. | 7-11,  Table 2, 3 |
| Risk of bias in studies | 18 | Present assessments of risk of bias for each included study. | 11-12,  Table 4 |
| Results of individual studies | 19 | For all outcomes, present, for each study: (a) summary statistics for each group (where appropriate) and (b) an effect estimate and its precision (e.g. confidence/credible interval), ideally using structured tables or plots. | Table 2 |
| Results of syntheses | 20a | For each synthesis, briefly summarise the characteristics and risk of bias among contributing studies. | 11-12,  Table 4 |
| 20b | Present results of all statistical syntheses conducted. If meta-analysis was done, present for each the summary estimate and its precision (e.g. confidence/credible interval) and measures of statistical heterogeneity. If comparing groups, describe the direction of the effect. | NA |
| 20c | Present results of all investigations of possible causes of heterogeneity among study results. | NA |
| 20d | Present results of all sensitivity analyses conducted to assess the robustness of the synthesized results. | NA |
| Reporting biases | 21 | Present assessments of risk of bias due to missing results (arising from reporting biases) for each synthesis assessed. | NA |
| Certainty of evidence | 22 | Present assessments of certainty (or confidence) in the body of evidence for each outcome assessed. | NA |
| **DISCUSSION** | | |  |
| Discussion | 23a | Provide a general interpretation of the results in the context of other evidence. | 12-17 |
| 23b | Discuss any limitations of the evidence included in the review. | 12-17 |
| 23c | Discuss any limitations of the review processes used. | 17 |
| 23d | Discuss implications of the results for practice, policy, and future research. | 16-17 |
| **OTHER INFORMATION** | | |  |
| Registration and protocol | 24a | Provide registration information for the review, including register name and registration number, or state that the review was not registered. | 3-4 |
| 24b | Indicate where the review protocol can be accessed, or state that a protocol was not prepared. | 3-4 |
| 24c | Describe and explain any amendments to information provided at registration or in the protocol. | NA |
| Support | 25 | Describe sources of financial or non-financial support for the review, and the role of the funders or sponsors in the review. | 18 |
| Competing interests | 26 | Declare any competing interests of review authors. | 18 |
| Availability of data, code and other materials | 27 | Report which of the following are publicly available and where they can be found: template data collection forms; data extracted from included studies; data used for all analyses; analytic code; any other materials used in the review. | NA |

**Note**: Reprinted from Page MJ, McKenzie JE, Bossuyt PM, Boutron I, Hoffmann TC, Mulrow CD, et al. The PRISMA 2020 statement: an updated guideline for reporting systematic reviews. BMJ 2021;372:n71. doi: 10.1136/bmj.n71. For more information, visit: http://www.prisma-statement.org/.15
